# Supplementary material for: Rehearsal initiates systems memory consolidation, sleep makes it last
Source: PubMed Central journal article supplement — Sci Adv. 2019 Apr 24;5(4):eaav1695. doi: 10.1126/sciadv.aav1695 (PMC6482015; doi:10.1126/sciadv.aav1695), 2019-04-24
Supplement: aav1695_SM.pdf [file aav1695_SM.pdf]

## Supplementary Materials for

### Rehearsal initiates systems memory consolidation, sleep makes it last

L. Himmer\*, M. Schönauer\*, D. P. J. Heib, M. Schabus, S. Gais

\*Corresponding author. Email: monika.schoenauer@uni-tuebingen.de (M. Schönauer); lea.himmer@uni-tuebingen.de (L.H.)

Published 24 April 2019, *Sci. Adv.* **5**, eaav1695 (2019)  
DOI: 10.1126/sciadv.aav1695

#### **This PDF file includes:**

Fig. S1. Memory performance.

Table S1. List of regions with decreasing activity over repeated learning (session 1).

Table S2. List of regions with increasing activity over repeated learning (session 1).

Table S3. List of regions with activity changes over repeated recall (session 1).

Table S4. List of regions with decreasing activity over repeated learning of new words (session 2).

Table S5. List of regions with increasing activity over repeated learning of new words (session 2).

Table S6. List of regions with a stronger response to old compared to new words (session 2).

Table S7. List of regions with a stronger response to new compared to old words (session 2).

## Supplementary Figure

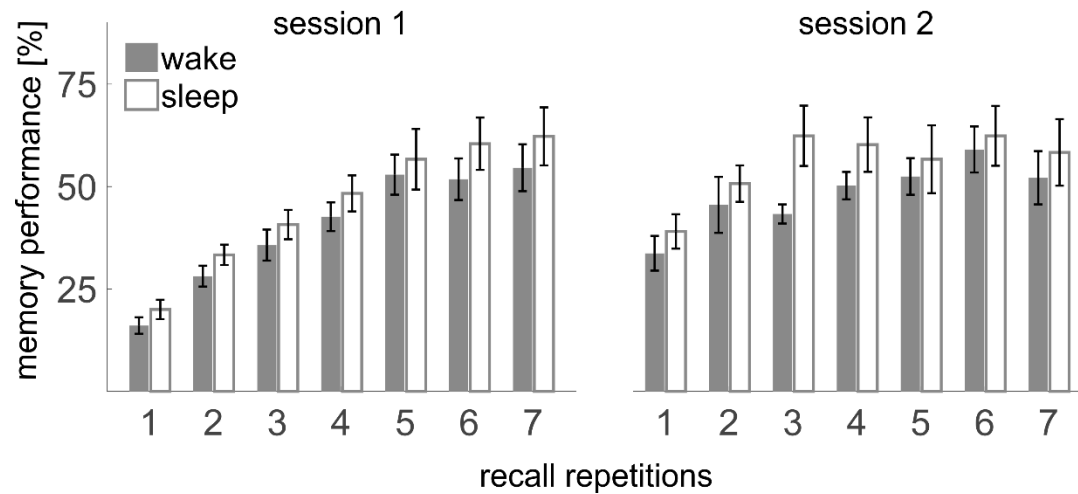

**Fig. S1. Memory performance.** Participants showed increasing memory performance within each session (repeated measures ANOVA, main effect of repetition, session 1:  $F_{1,3.45} = 39.99$ ,  $p < 0.001$ ; session 2:  $F_{1,2.98} = 7.40$ ,  $p < 0.001$ ). Learning slopes were steeper in session 1, whereas memory performance was generally higher in session 2 (repeated measures ANOVA, main effect of session:  $F_{1,1} = 18.412$ ,  $p < 0.001$ ; interaction session  $\times$  repetition:  $F_{1,2.537} = 5.032$ ,  $p = 0.005$ ). Sleep and wake groups did not differ significantly within sessions (repeated measures ANOVA, main effect sleep/wake, session 1:  $F_{1,27} = 1.489$ ,  $p = 0.233$ ; session 2:  $F_{1,28} = 1.389$ ,  $p = 0.248$ ; interaction repetition  $\times$  sleep/wake, session 1:  $F_{1,3.45} = 0.097$ ,  $p = 0.974$ ; session 2:  $F_{1,2.98} = 0.991$ ,  $p = 0.401$ ) nor did memory retention across sessions differ between both groups (repeated measures ANOVA, interaction last recall session 1 / first recall session 2  $\times$  sleep/wake:  $F_{1,29} = 0.014$ ,  $p = 0.908$ ).

## Supplementary Tables

**Table S1. List of regions with decreasing activity over repeated learning (session 1).** Table denotes clusters with a minimal extent of 20 voxels at a whole-brain family wise error correction of  $p_{FWE} \leq 0.05$ . Coordinates are given in Montreal Neurological Institute space. Region labels were obtained using the Anatomy toolbox implemented in SPM8. Clusters marked with a \* were extracted to serve as regions of interests for subsequent analyses.

| anatomical region |                                                          | MNI coordinates (mm) |     |     | T     | p <sub>FWE</sub> |
|-------------------|----------------------------------------------------------|----------------------|-----|-----|-------|------------------|
|                   |                                                          | x                    | y   | z   |       |                  |
| right             | rolandic operculum                                       | 40                   | -16 | 20  | 7.136 | < 0.001          |
|                   |                                                          | 38                   | -30 | 28  | 5.250 | 0.014            |
| left              | Medial prefrontal cortex<br>& anterior cingulate cortex* | 0                    | 40  | 6   | 6.836 | < 0.001          |
|                   |                                                          | -6                   | 50  | 2   | 6.793 | < 0.001          |
|                   |                                                          | -14                  | 0   | 28  | 6.214 | < 0.001          |
| left              | hippocampus*                                             | -16                  | -42 | 8   | 6.435 | < 0.001          |
|                   |                                                          | -26                  | -36 | 0   | 5.585 | 0.005            |
|                   |                                                          | -30                  | -28 | -10 | 5.428 | 0.008            |
| left              | inferior frontal gyrus                                   | -38                  | 32  | -12 | 6.292 | < 0.001          |
| left              | superior temporal gyrus                                  | -54                  | -10 | -2  | 6.043 | < 0.001          |
| left              | insular lobe                                             | -38                  | -14 | 26  | 5.634 | 0.004            |
| left              | paracentral lobule                                       | -12                  | -34 | 70  | 5.530 | 0.006            |
|                   |                                                          | -20                  | 34  | 48  | 5.442 | 0.007            |
| left              | superior frontal gyrus                                   | -12                  | 48  | 44  | 5.100 | 0.022            |
|                   |                                                          | -22                  | 46  | 40  | 5.046 | 0.026            |
|                   |                                                          | 12                   | -32 | 76  | 5.309 | 0.011            |
| right             | postcentral gyrus                                        | 12                   | -32 | 76  | 5.309 | 0.011            |
| right             | calcarine gyrus                                          | 30                   | -52 | 14  | 5.257 | 0.014            |
| right             | superior frontal gyrus                                   | 18                   | 34  | 50  | 5.063 | 0.025            |

**Table S2. List of regions with increasing activity over repeated learning (session 1).** Table denotes clusters with a minimal extent of 20 voxels at a whole-brain family wise error correction of  $p_{FWE} \leq 0.05$ . Clusters marked with a \* were extracted to serve as regions of interests for subsequent analyses.

| anatomical region |                                         | MNI coordinates (mm) |     |     | T     | p <sub>FWE</sub> |
|-------------------|-----------------------------------------|----------------------|-----|-----|-------|------------------|
|                   |                                         | x                    | y   | z   |       |                  |
| right             | superior & inferior<br>parietal lobule* | 48                   | -38 | 58  | 6.898 | < 0.001          |
|                   |                                         | 34                   | -52 | 64  | 6.379 | < 0.001          |
|                   |                                         | 42                   | -46 | 62  | 6.313 | < 0.001          |
| right             | Inferior temporal gyrus                 | 60                   | -42 | -18 | 5.851 | 0.002            |
| left              | cerebellum                              | -8                   | -74 | -48 | 5.553 | 0.005            |
| right             | Precuneus*                              | 12                   | -70 | 52  | 5.318 | 0.011            |

**Table S3. List of regions with activity changes over repeated recall (session 1).** Table denotes clusters at a whole-brain family wise error correction of  $p_{FWE} \leq 0.05$ .

| anatomical region          |                          | MNI coordinates (mm) |     |     | T     | p <sub>FWE</sub> |
|----------------------------|--------------------------|----------------------|-----|-----|-------|------------------|
|                            |                          | x                    | y   | z   |       |                  |
| Increases over repetitions |                          |                      |     |     |       |                  |
| right                      | cuneus                   | 16                   | -90 | 42  | 5.867 | 0.008            |
| right                      | precuneus                | 12                   | -66 | 30  | 5.083 | 0.023            |
| right                      | Superior occipital gyrus | 28                   | -86 | 32  | 4.918 | 0.039            |
|                            |                          | 28                   | -88 | 24  | 4.883 | 0.043            |
| Decreases over repetitions |                          |                      |     |     |       |                  |
| Left                       | Supramarginal gyrus      | -60                  | -50 | 24  | 5.174 | 0.002            |
|                            |                          | -58                  | -50 | 32  | 5.122 | 0.003            |
| right                      | Medial temporal pole     | 54                   | 18  | -28 | 5.779 | 0.002            |
| right                      | Medial prefrontal cortex | 4                    | 56  | 36  | 4.734 | 0.014            |
| right                      | Medial prefrontal cortex | -10                  | 60  | 28  | 4.541 | 0.031            |
| left                       | Medial prefrontal cortex | 0                    | 54  | 20  | 4.458 | 0.043            |
| right                      | Superior medial gyrus    | 4                    | 48  | 6   | 4.456 | 0.044            |

**Table S4. List of regions with decreasing activity over repeated learning of new words (session 2).** Table denotes clusters with a minimal extent of 20 voxels at a whole-brain family wise error correction of  $p_{FWE} \leq 0.05$ .

| anatomical region |             | MNI coordinates (mm) |     |     | T     | p <sub>FWE</sub> |
|-------------------|-------------|----------------------|-----|-----|-------|------------------|
|                   |             | x                    | y   | z   |       |                  |
| left              | hippocampus | -28                  | -18 | -16 | 5.138 | 0.007            |

**Table S5. List of regions with increasing activity over repeated learning of new words (session 2).** Table denotes clusters with a minimal extent of 20 voxels at  $p \leq 0.001$  that survived small-volume FWE correction at  $p \leq 0.05$  within the given volume. Small-volume correction was applied to precuneus and IPL ROIs (see Table S2), but resulted in no significant voxels in the case of the precuneus. All areas can also be considered significant after applying an additional Bonferroni correction for testing two ROIs ( $p_{svc} \leq 0.025$ ).

| anatomical region            |                          | MNI coordinates (mm) |     |    | T     | p <sub>svc</sub> |
|------------------------------|--------------------------|----------------------|-----|----|-------|------------------|
|                              |                          | x                    | y   | z  |       |                  |
| small-volume correction: IPL |                          |                      |     |    |       |                  |
| right                        | Superior parietal lobule | 28                   | -52 | 70 | 3.742 | 0.008            |
| right                        | Postcentral gyrus        | 40                   | -40 | 64 | 3.625 | 0.012            |
|                              |                          | 54                   | -28 | 58 | 3.568 | 0.014            |
|                              |                          | 52                   | -30 | 62 | 3.465 | 0.019            |

**Table S6. List of regions with a stronger response to old compared to new words (session 2).** Table denotes clusters with a minimal extent of 20 voxels at  $p \leq 0.001$  that survived small-volume FWE correction at  $p \leq 0.05$  within the given volume. Small-volume correction was applied to precuneus and IPL ROIs (see Table S2). All areas can also be considered significant after applying an additional Bonferroni correction for testing two ROIs ( $p_{svc} \leq 0.025$ ).

| <b>anatomical region</b>           |                          | <b>MNI coordinates (mm)</b> |          |          | <b>T</b> | <b>psvc</b> |
|------------------------------------|--------------------------|-----------------------------|----------|----------|----------|-------------|
|                                    |                          | <b>x</b>                    | <b>y</b> | <b>z</b> |          |             |
| small-volume correction: IPL       |                          |                             |          |          |          |             |
| right                              | angular gyrus            | 42                          | -58      | 52       | 3.835    | 0.006       |
| right                              | inferior parietal lobule | 44                          | -58      | 48       | 3.828    | 0.006       |
| right                              | superior parietal lobule | 40                          | -48      | 64       | 3.713    | 0.009       |
| right                              | superior parietal lobule | 42                          | -52      | 58       | 3.596    | 0.013       |
| small-volume correction: precuneus |                          |                             |          |          |          |             |
| right                              | precuneus                | 42                          | -70      | 54       | 3.385    | 0.002       |

**Table S7. List of regions with a stronger response to new compared to old words (session 2).** Table denotes clusters with a minimal extent of 20 voxels at  $p \leq 0.001$  that survived small-volume FWE correction at  $p \leq 0.05$  within the given volume. Small-volume correction was applied to hippocampus and mPFC ROIs (see Table S1), but resulted in no suprathreshold voxels in the case of the mPFC. All areas can also be considered significant after applying an additional Bonferroni correction for testing two ROIs ( $p_{svc} \leq 0.025$ ).

| <b>anatomical region</b>             |             | <b>MNI coordinates (mm)</b> |          |          | <b>T</b> | <b>psvc</b> |
|--------------------------------------|-------------|-----------------------------|----------|----------|----------|-------------|
|                                      |             | <b>x</b>                    | <b>y</b> | <b>z</b> |          |             |
| small-volume correction: hippocampus |             |                             |          |          |          |             |
| left                                 | hippocampus | -32                         | -26      | -16      | 3.565    | 0.007       |
| left                                 | hippocampus | -26                         | -40      | 2        | 3.434    | 0.010       |
| left                                 | hippocampus | -28                         | -38      | -2       | 3.295    | 0.015       |
